# Supplementary material for: Surface engineering: binary Mg,Fe-LDH· x Fe 3 O 4 nanocomposites for improved magnetic solid-phase extraction of pharmaceuticals from aqueous solution
Source: Royal Society of Chemistry journal article supplement (doi:10.1039/d4ma00609g), 2024-01-01
Supplement: d4ma00609g1.pdf [file d4ma00609g1.pdf]

## ELECTRONIC SUPPLEMENTARY INFORMATION

### **Surface Engineering: Binary MgFe-LDH·xFe<sub>3</sub>O<sub>4</sub> nanocomposites for Improved Magnetic Solid-Phase Extraction of Pharmaceuticals from Aqueous Solution**

***Tetiana Hubetska<sup>1,2</sup>, Victor Demchenko<sup>1</sup>, Natalia Kobylinska<sup>1\*</sup>***

*<sup>1</sup>A.V. Dumansky Institute of Colloid and Water Chemistry, National Academy of Science of Ukraine, 42 Akad. Vernadsky Blvd, Kyiv, 03142, Ukraine*

*<sup>2</sup>Nanomaterials and Nanotechnology Research Center (CINN-CSIC), University of Oviedo, Avda. de la Vega 4-6, El Entrego, 33940, Spain*

\*Corresponding author: **Dr. Natalia Kobylinska**

e-mail: [kobilinskaya@univ.kiev.ua](mailto:kobilinskaya@univ.kiev.ua)

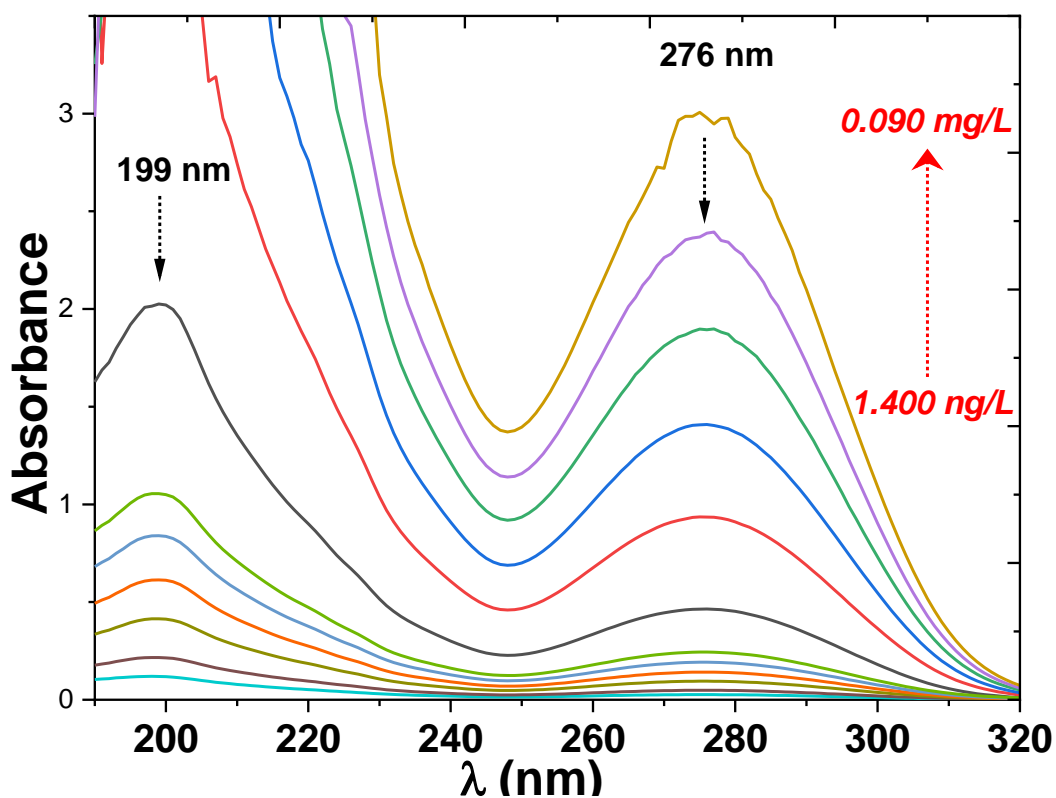

**Figure S1.** UV-Vis spectra of Diclofenac Sodium solution in the full linearity range

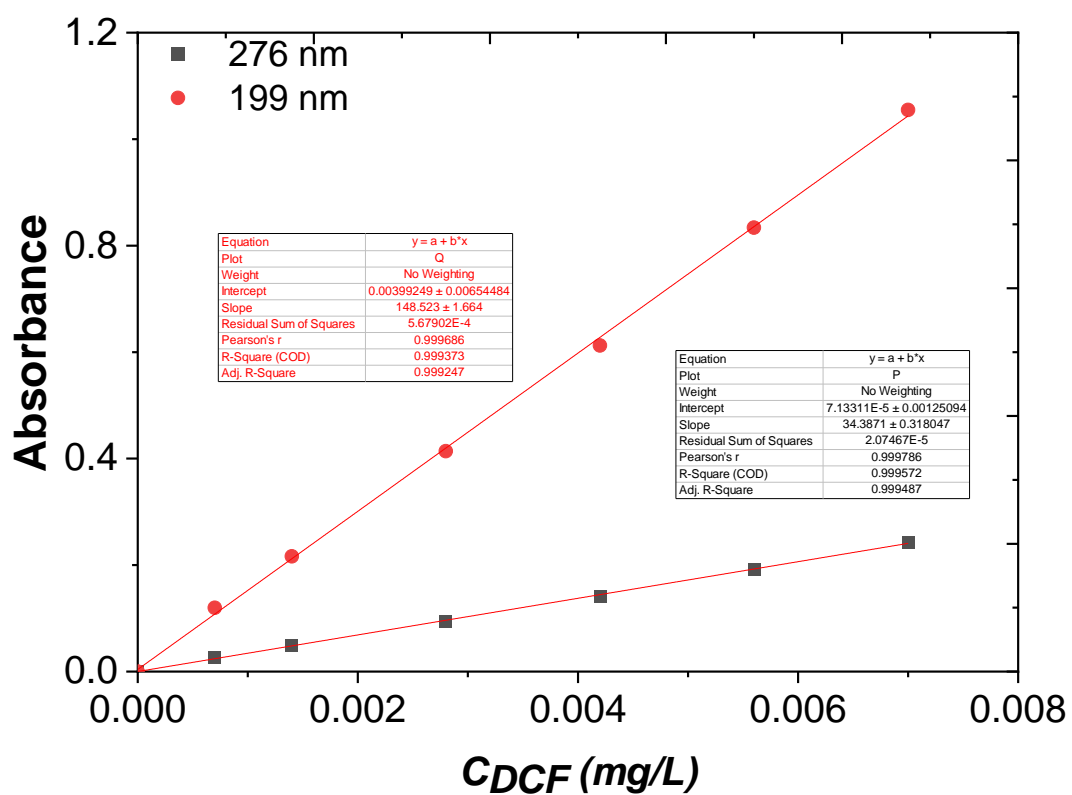

**Figure S2.** Calibration curves for determination of Diclofenac Sodium at various wavelengths: 276 nm and 199 nm

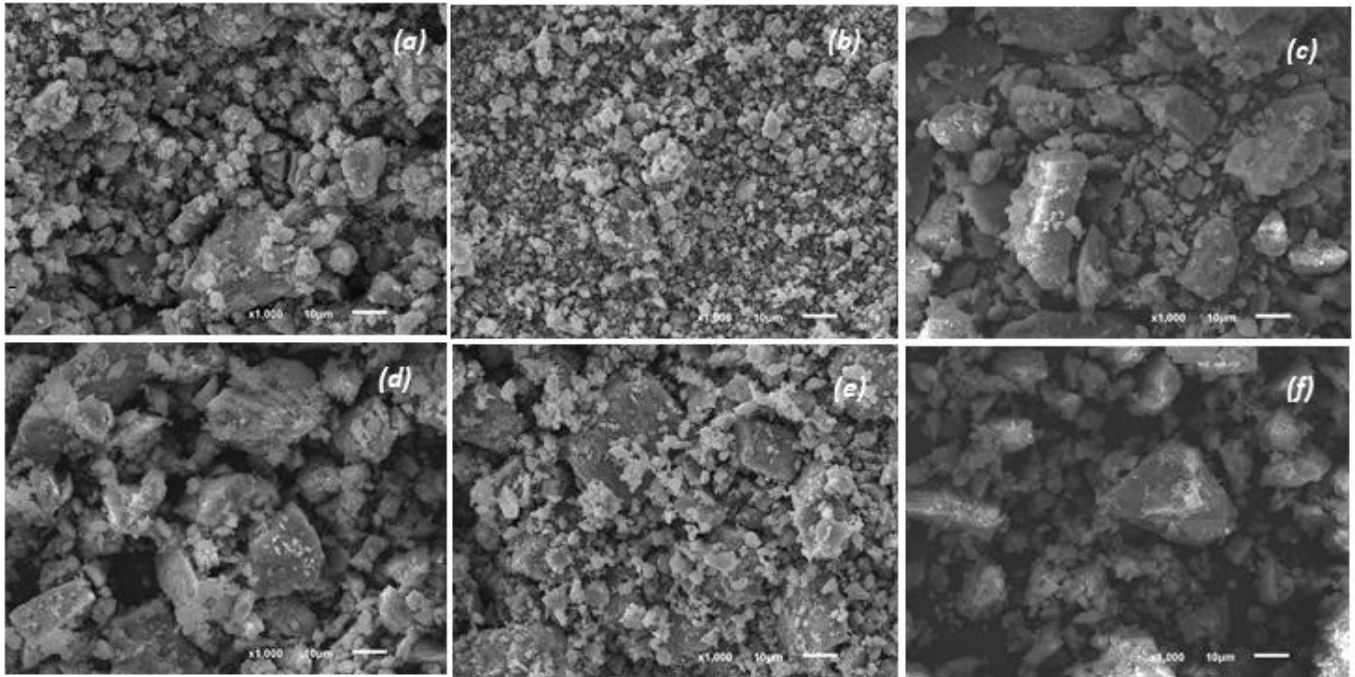

**Figure S3.** SEM images of pristine  $Fe_3O_4$  (a),  $Mg,Fe$ -LDHs (b),  $Mg,Fe$ -LDH·0.1 $Fe_3O_4$  (c),  $Mg,Fe$ -LDH·0.3 $Fe_3O_4$  (d),  $Mg,Fe$ -LDH·0.5 $Fe_3O_4$  (e) and  $Mg,Fe$ -LDH·1.0 $Fe_3O_4$  (f) samples

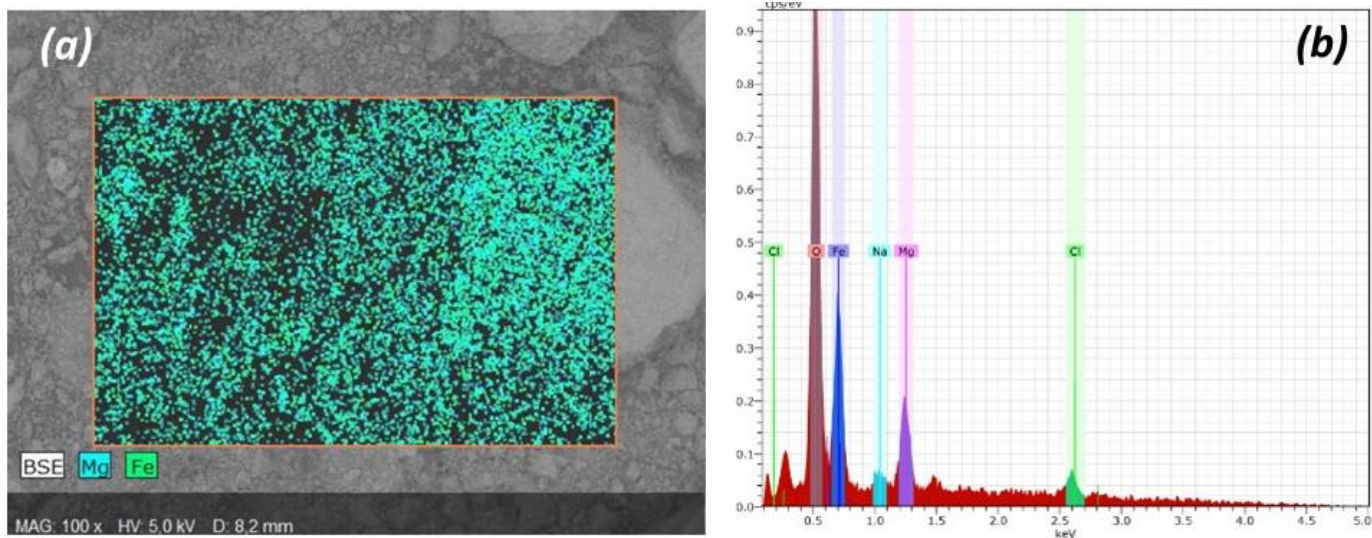

**Figure S4.** EDX mapping (a) and spectrum (b) of  $Mg,Fe$ -LDHs sample

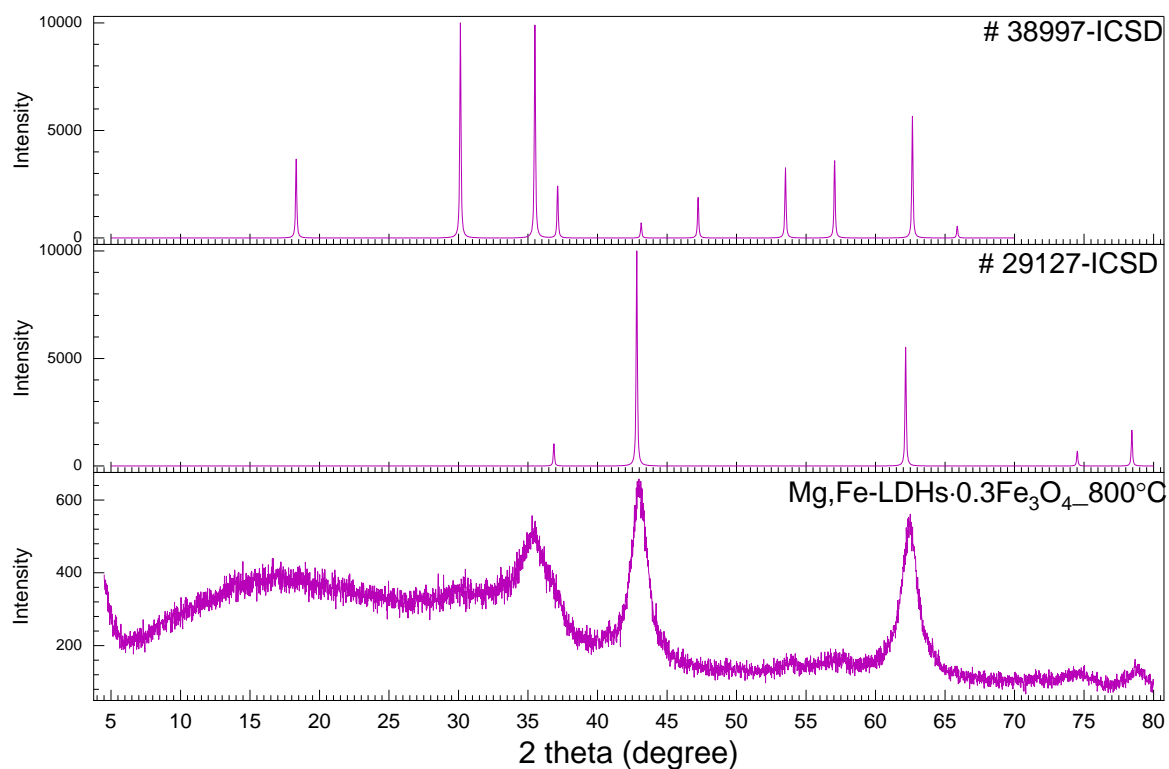

**Figure S5.** XRD patterns of *Mg,Fe-LDH-0.3Fe<sub>3</sub>O<sub>4</sub>* calcinated at 800°C and corresponding references (*MgFe<sub>2</sub>O<sub>4</sub>* (# 38997-ICSD) and *MgO* (# 29127-ICSD)) from ICSD database

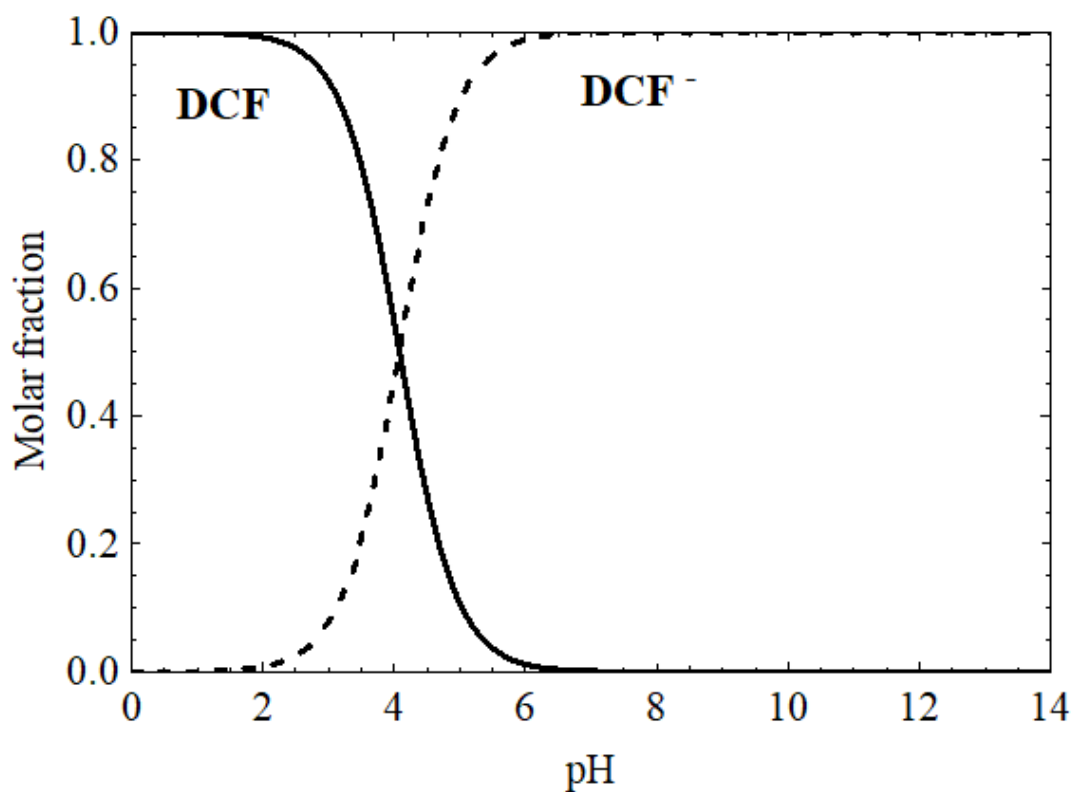

**Figure S6.** Speciation diagram of DCF as a function of the pH solution

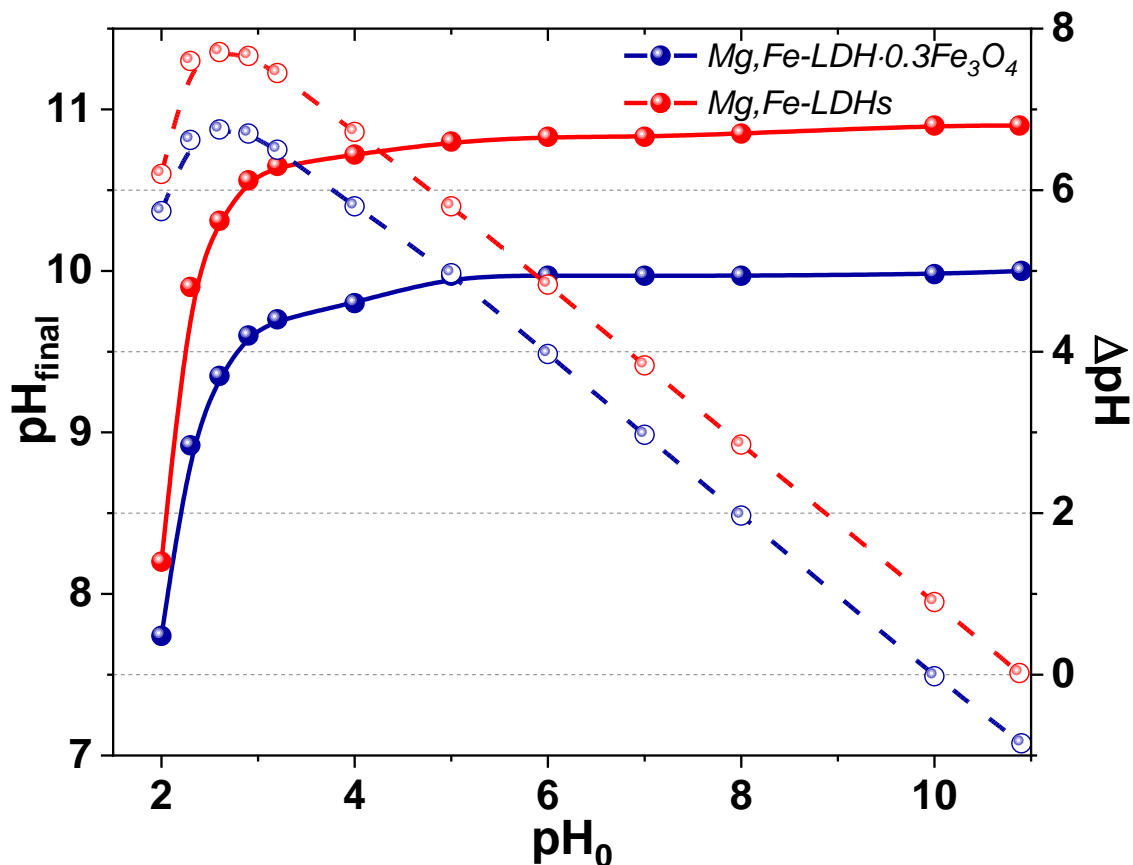

**Figure S7.** The  $pH_{PZC}$  determination for obtained adsorbents (Conditions: weight 0.050 g, volume 50 mL, time 24 h,  $C(\text{NaClO}_4) = 0.1 \text{ M}$ )

**Table S1.** Parameters for the intra-particle diffusion kinetic model of the as-prepared materials

| Sample                                          | 1 <sup>st</sup> stage |        |        | 2 <sup>nd</sup> stage |       |        | 3 <sup>rd</sup> stage |        |        |
|-------------------------------------------------|-----------------------|--------|--------|-----------------------|-------|--------|-----------------------|--------|--------|
|                                                 | $K_i$                 | C      | $R^2$  | $K_i$                 | C     | $R^2$  | $K_i$                 | C      | $R^2$  |
| <i>Mg,Fe-LDHs</i>                               | 0.0463                | 0.0012 | 0.9996 | 0.024                 | 0.134 | 0.9279 | 0.00075               | 0.3781 | 0.7494 |
| <i>Mg,Fe-LDH·0.3Fe<sub>3</sub>O<sub>4</sub></i> | 0.0407                | 0.0028 | 0.9974 | 0.023                 | 0.109 | 0.9224 | 0.0016                | 0.332  | 0.8836 |
| <i>Mg,Fe-LDH·0.5Fe<sub>3</sub>O<sub>4</sub></i> | 0.0295                | 0.0016 | 0.9974 | 0.020                 | 0.062 | 0.9447 | 0.0310                | 0.2392 | 0.8394 |
| $\text{Fe}_3\text{O}_4$                         | 0.00265               | 0.0005 | 0.9805 | -                     | -     | -      | 0.0009                | 0.0158 | 0.9142 |

Table footnotes.  $K_i$  - rate constant of intraparticle diffusion, ( $\text{mmol}\cdot\text{g}^{-1} \text{ min}^{-1/2}$ ); C - the intercept, ( $\text{mmol/g}$ ).

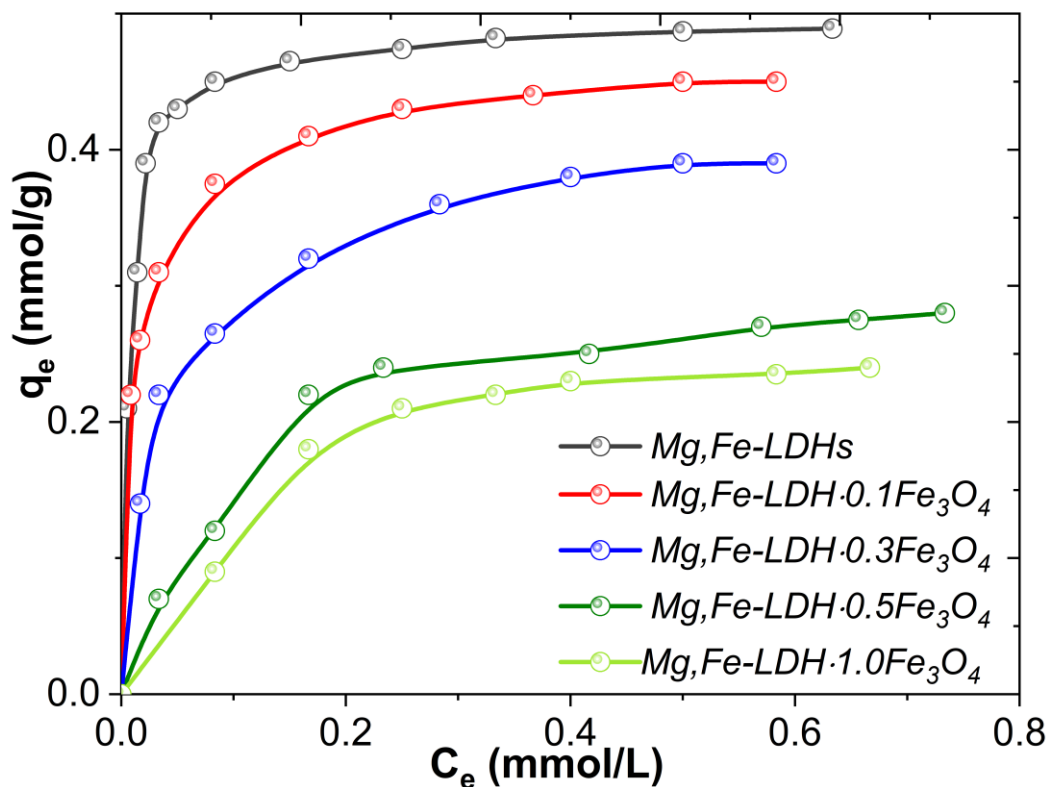

**Figure S8.** Adsorption isotherms (mmol/g) of DCF onto *Mg,Fe-LDHs* and corresponding magnetic nanocomposites at room temperature (Conditions: pH =  $7.5 \pm 0.1$ , m/V = 1.00 g/L, time overnight, at room temperature)

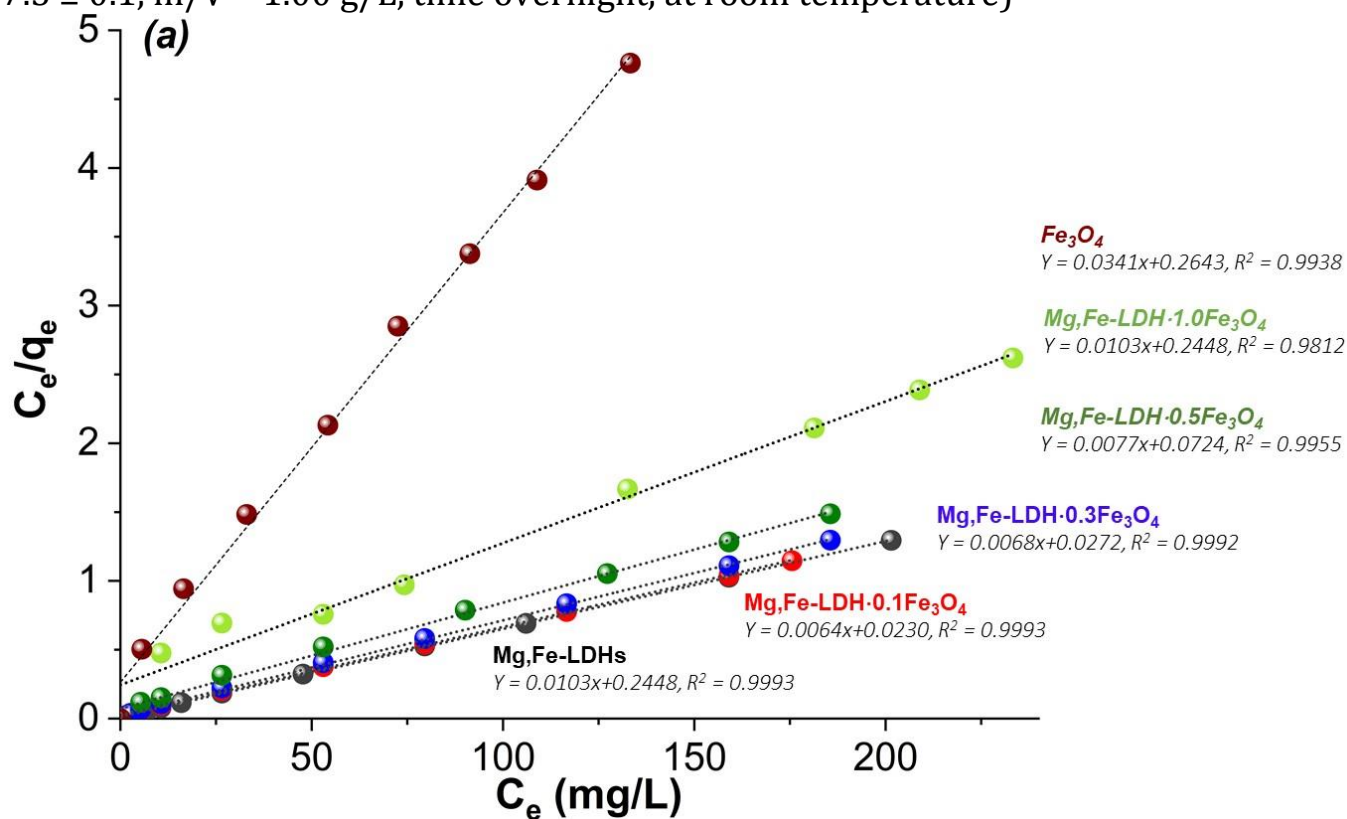

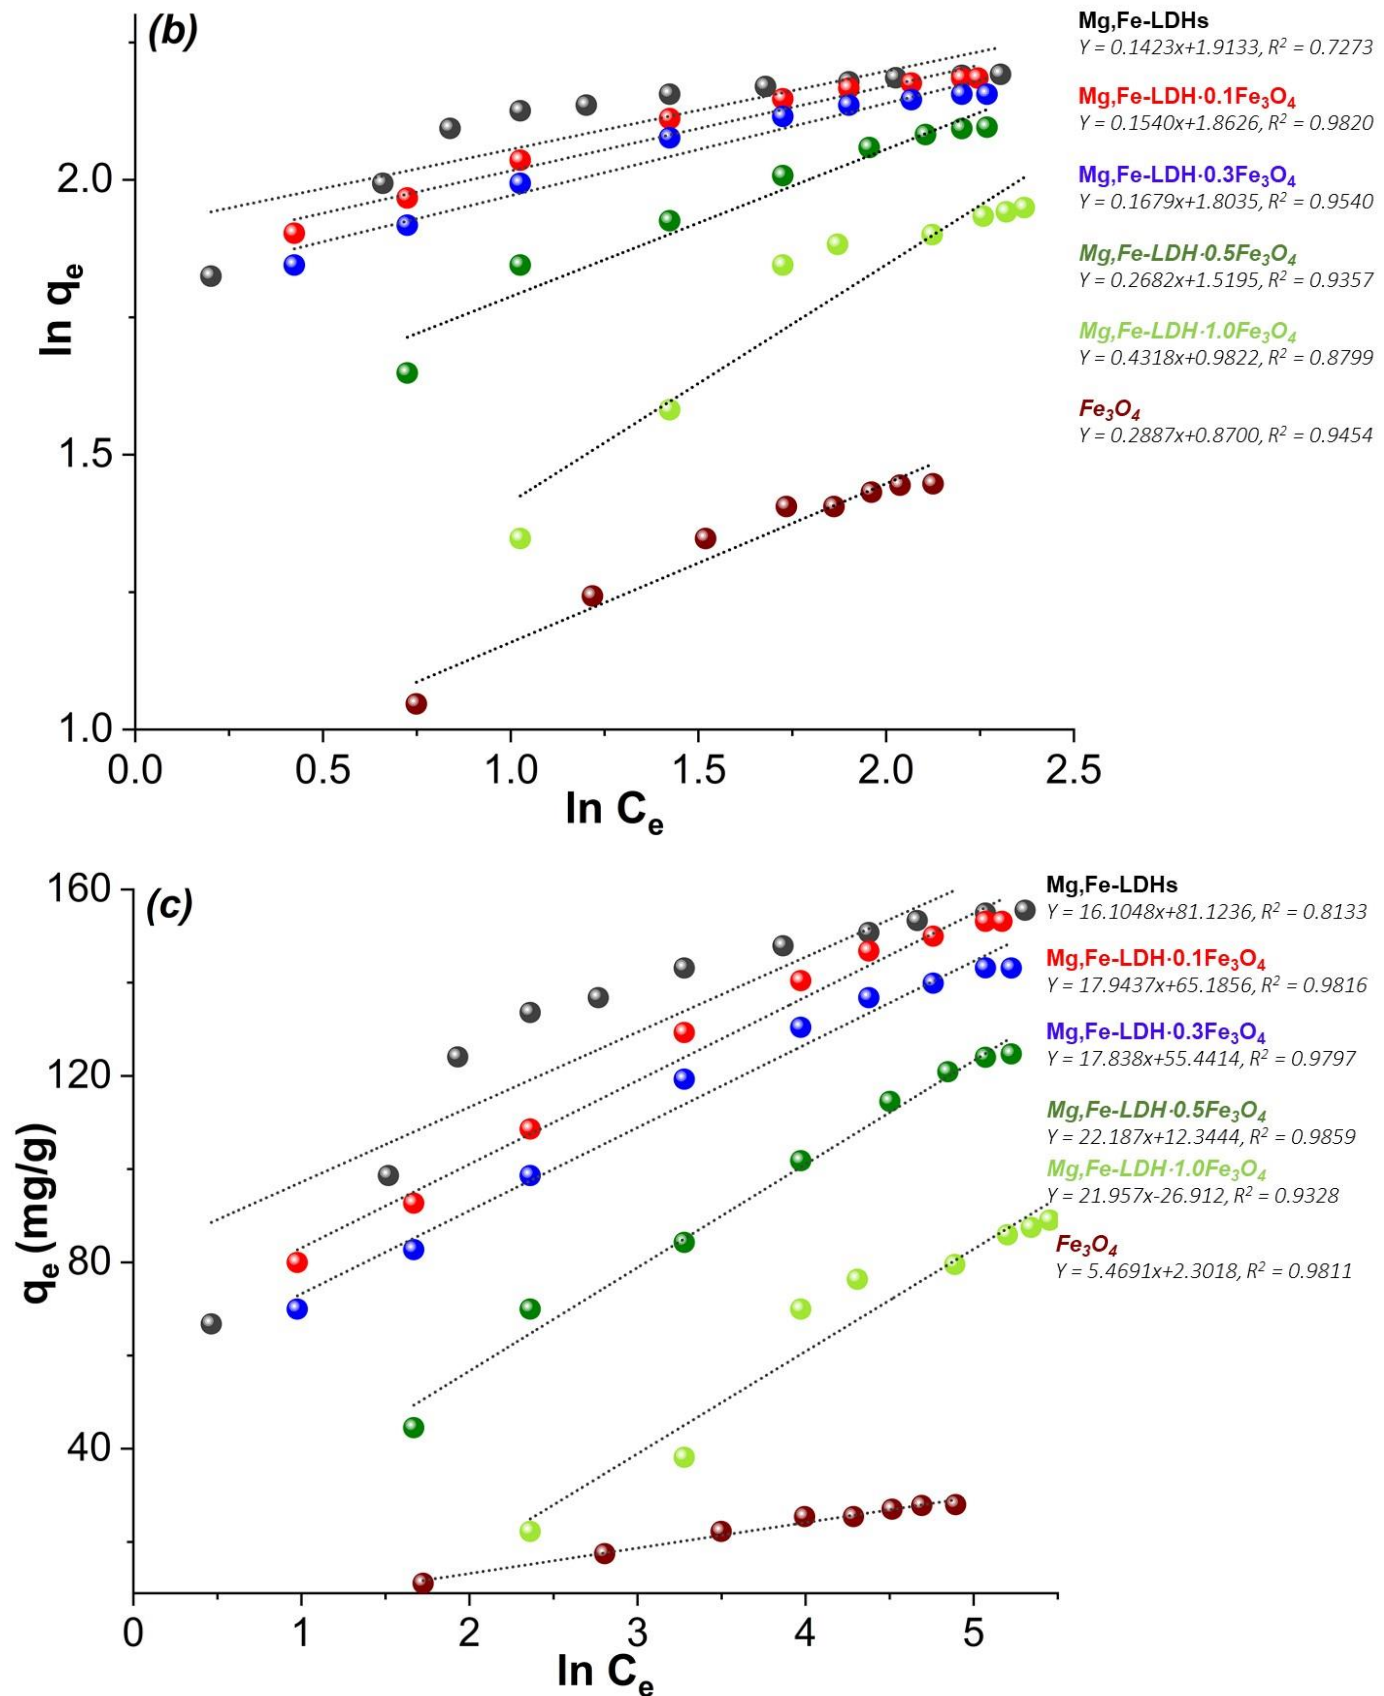

**Figure S9.** Linear fitting of adsorption isotherms with Langmuir (a), Freundlich (b) and Temkin (c) equations for DCF on obtained samples
